# Supplementary material
Source: PubMed Central journal article supplement (PMC2938083)

**Supplemental Figure 1. Procedural schematic for 2-DE proteomics analysis of both *Dhcr7*<sup>Δ3-5/Δ3-5</sup> and *Sc5d*<sup>-/-</sup> embryonic brain tissue.**

**Supplemental Figure 2. Schematic representation of the mevalonate pathway in animal cells.** The mevalonate pathway is involved in the synthesis of cholesterol as well as nonsteroidal isoprenoids.

**Supplemental Table I. Predicted False Positive Rate.**

|                                             | Student's <i>t</i> test <b>P &lt; 0.05</b> |                   |                    |
|---------------------------------------------|--------------------------------------------|-------------------|--------------------|
|                                             | <b>R &gt; 1.2</b>                          | <b>R &gt; 1.5</b> | <b>R &gt; 2.0</b>  |
| <i>Dhcr7</i> +/+ VS <i>Dhcr7</i> -/-        | <b>56</b>                                  | <b>46</b>         | <b>19</b>          |
| <i>Sc5d</i> +/+ VS <i>Sc5d</i> -/-          | <b>52</b>                                  | <b>38</b>         | <b>10</b>          |
| <i>Dhcr7</i> +/+ VS <i>Sc5d</i> +/+         | <b>19</b>                                  | <b>3</b>          | <b>1</b>           |
|                                             |                                            |                   |                    |
| <b>False Positive Rate for <i>Dhcr7</i></b> | <b>33.9%(19/56)</b>                        | <b>6.5%(3/46)</b> | <b>5.3%(1/19)</b>  |
| <b>False Positive Rate for <i>Sc5d</i></b>  | <b>36.5%(19/52)</b>                        | <b>7.9%(3/38)</b> | <b>10.0%(1/10)</b> |

## Supplemental Figure 1

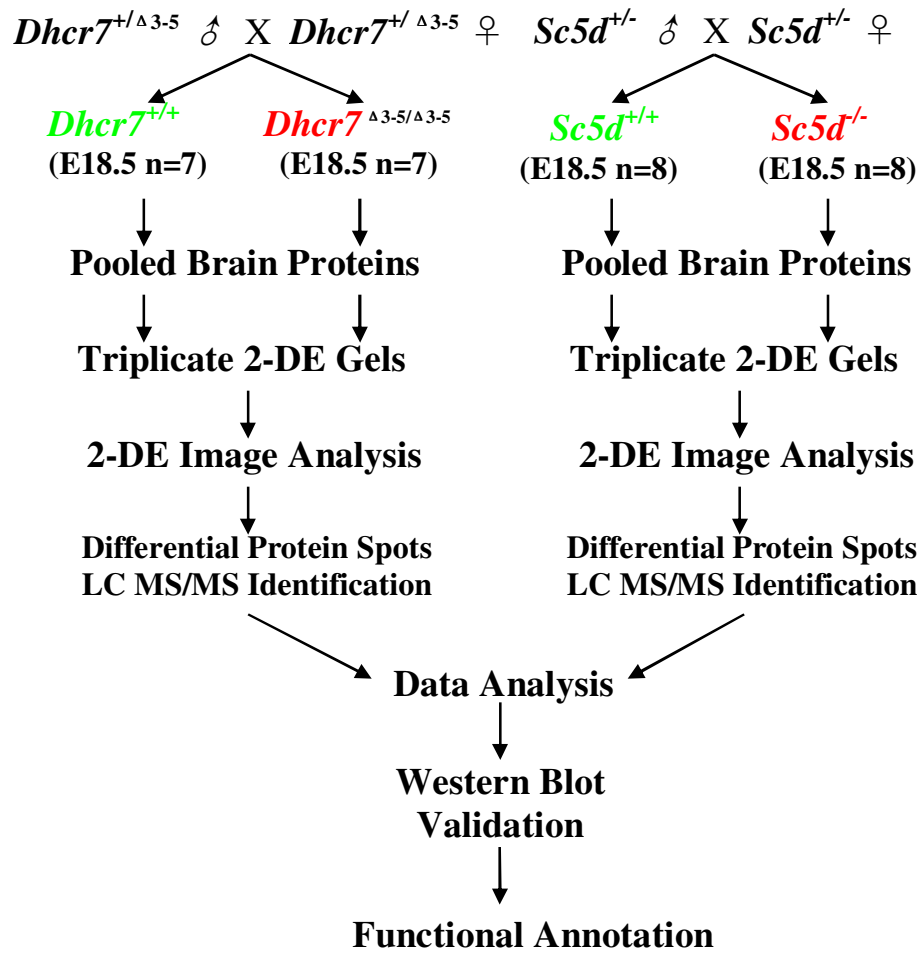

Supplemental Figure 2

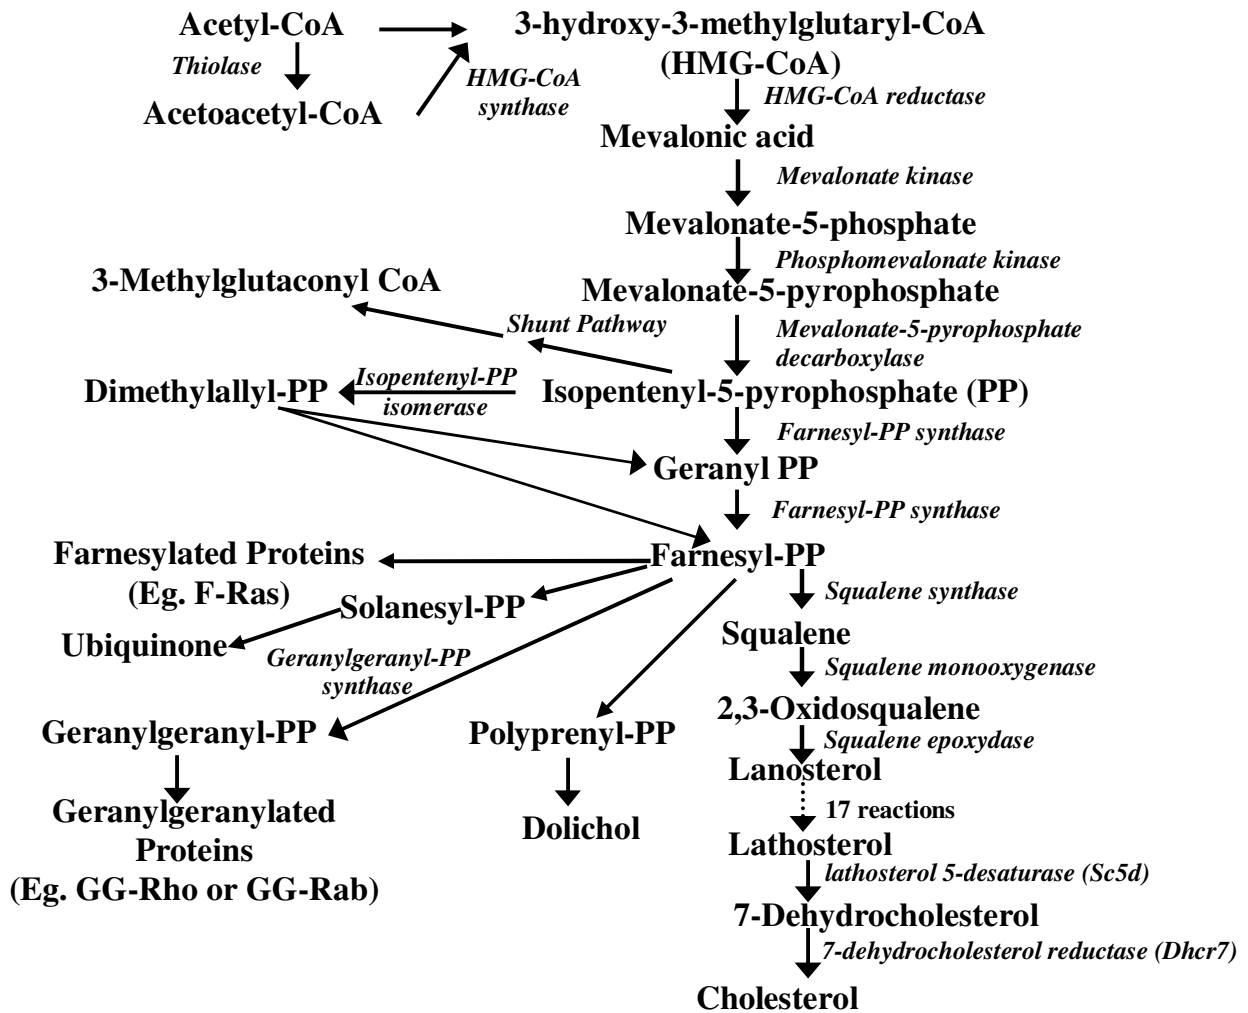

Supplement: supp_M900548-MCP200_SuppFigs_and_SuppTable1.pdf [file supp_M900548-MCP200_SuppFigs_and_SuppTable1.pdf]
